## ERRATA

To the paper "Comparative Studies on Nonlinear Hyperbolic and Parabolic Heat Conduction for Various Boundary Conditions: Analytic and Numerical Solutions," by A. Kar, C. L. Chan, and J. Mazumder, published in the ASME JOURNAL OF HEAT TRANSFER, Vol. 114, No. 1, February 1992, pp. 14-20.

- 1 The title of Table 2 on p. 18:

*Original:* Table 2 Temperature field for Case 3 at  $t = 0.05$  for  $T_o = 9$ ,  $q_a = -7$ ,  $\delta = 0.2$ , and  $\epsilon = 0.2$

*Change to:* Table 2 Temperature field for Case 3 at  $t = 0.05$  for  $T_o = 9$ ,  $q_a = -7$ ,  $\delta = 0.2$ , and  $\epsilon = 20.0$

- 2 On p. 19 we discuss the results for Case 2:

*Original:* We will now present the results for Case 2 (specified heat flux on both ends). In all cases presented below, the flux is specified to be 0.3 on the left-hand boundary and  $-0.2$  on the right.

*Change to:* We will now present the results for Case 2 (specified heat flux on both ends). In all cases presented below, the flux is specified to be 0.5 on the left-hand boundary and  $-0.2$  on the right.

- 3 On p. 19 we discuss the results for Case 3:

*Original:* For Case 3, the temperature is kept at  $T^*/T_r^* = 3.0$  at  $x = 0$  and the flux is kept at -1.0 at  $x = 1$  in this study.

*Change to:* For Case 3, the temperature is kept at  $T^*/T_r^* = 3.0$  at  $x = 0$  and the flux is kept at -2.0 at  $x = 1$  in this study.
